# Supplementary material
Source: PubMed Central journal article supplement (PMC9015558)
Supplement: JMV-94-1773-s001.pdf [file JMV-94-1773-s001.pdf]

# GARD

## Genetic Algorithm for Recombination Detection

Export ▾

**11**  
sequences in the alignment

**1277**  
sites in the alignment

**43**  
potential breakpoints

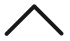

**1**  
inferred breakpoints

**838**  
models considered

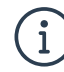

**0.846631**  
Δ c-AIC vs the null model

**7.91266**  
Δ c-AIC vs the single tree multiple partition

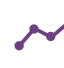

GARD **found evidence** of recombination breakpoints. GARD examined **838** models at a rate of **26.19** models per second. The alignment contained **43** potential breakpoints, translating into a search space of **946** models with up to **2** breakpoints, of which **88.58%** was explored by the genetic algorithm.

See [here](#) for more information about this method.

Please cite [PMID 16818476](#) if you use this result in a publication, presentation, or other scientific work.

### Figures

**Figure 1.** Left: the best placement of breakpoints inferred by the algorithm for each number of breakpoints considered. Right: the improvement in the c-AIC score between successive breakpoint numbers (log scale).

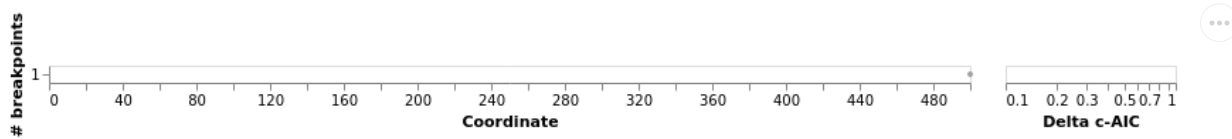

**Figure 2.** Model-averaged support for breakpoint placement

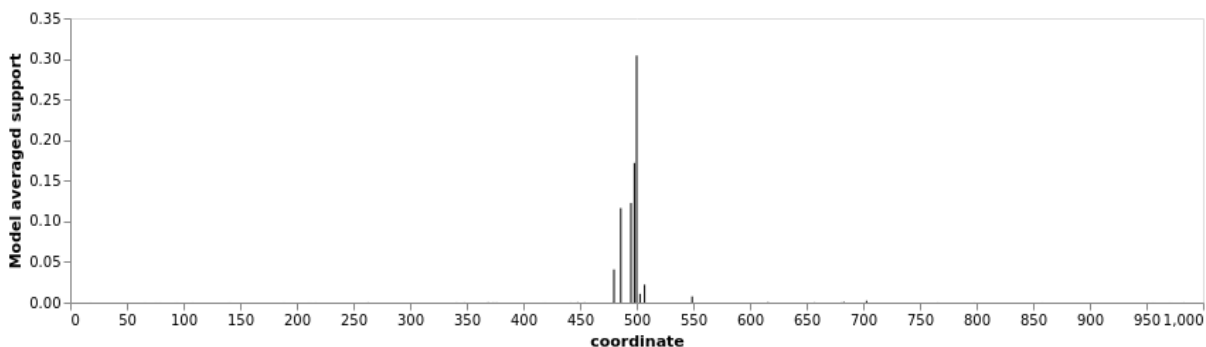

**Figure 3.** Total tree length by partition

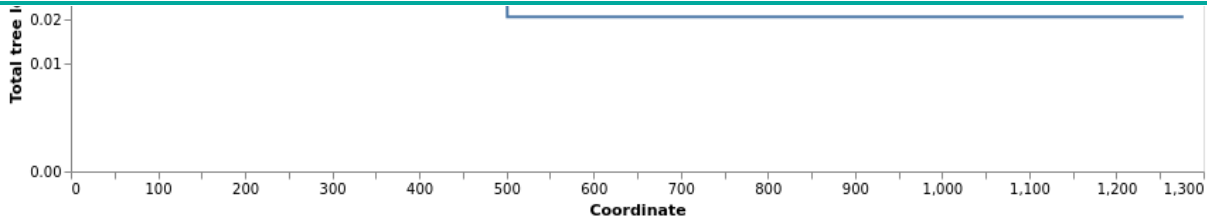

Figure 4. Trees for individual fragments

Select some sequences to highlight

Select some sequences

HCOV\_19\_KENYA\_DELTA\_EPI\_ISL\_3031406 X HCOV\_19\_SOUTH\_AFRICA\_BETA\_EPI\_ISL\_660629 X

variants = ►Array(2) ["HCOV\_19\_KENYA\_DELTA\_EPI\_ISL\_3031406", "HCOV\_19\_SOUTH\_AFRICA\_BETA\_EPI\_ISL\_660629"]

Tree 1, coordinate range 1-500

Tree 2, coordinate range 501-1277

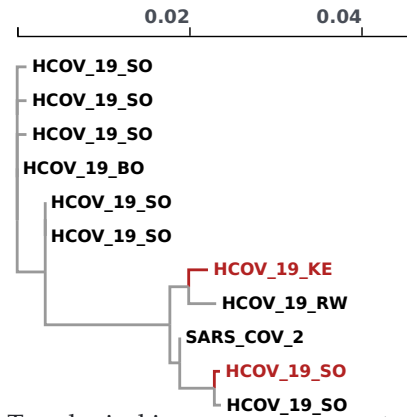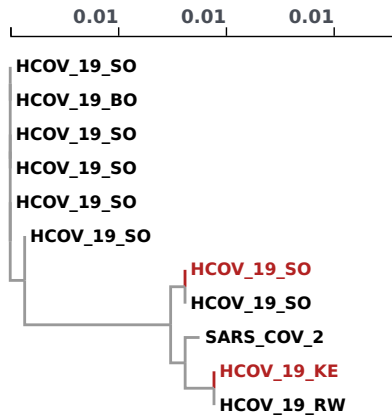

Topological incongruence report  
 displayed\_trees = ►Array(2) [Q, Q]

Comparing the  $AIC_c$  score of the best fitting GARD model, that allows for different topologies between segments (8275.3), and that of the model that assumes the same tree for all the partitions inferred by GARD, but allows different branch lengths between partitions (8283.3) suggests that because the multiple tree model cannot be preferred over the single tree model by an evidence ratio of 100 or greater, *some or all of the breakpoints may reflect rate variation instead of topological incongruence.*

Datamonkey is funded jointly by MIDAS and NIH award R01 GM093939

**Tweets** by @hyphy\_software

---

**HyPhy**  
@hyphy\_software

Have a small dataset but still want to test for selection per-site? 🦠FEL with parametric bootstrap is now available in HyPhy 2.5.33 and Datamonkey. 🌱 Full description can be found here ➡️ [hyphy.org/news/](https://hyphy.org/news/)

Oct 15, 2021

---

HyPhy Retweeted

**Spyros Lytras**  
@SpyrosLytras

Replying to @SpyrosLytras

We used an array of methods implemented in @hyphy\_software to search for site-, branch- and ORF-specific selection in the phylogenetic clade SARS-CoV-2 emerged from (we refer to as the 'nCoV' clade) 9/18

Embed
View on Twitter
